# Supplementary material for: Thermo-responsive gels that absorb moisture and ooze water
Source: PubMed Central journal article supplement (PMC5998054; doi:10.1038/s41467-018-04810-8), 2018-06-13
Supplement: 41467_2018_4810_MOESM1_ESM.pdf [file 41467_2018_4810_MOESM1_ESM.pdf]

# Thermo-Responsive Gels That Absorb Moisture and Ooze Water

*Matsumoto et. al.*

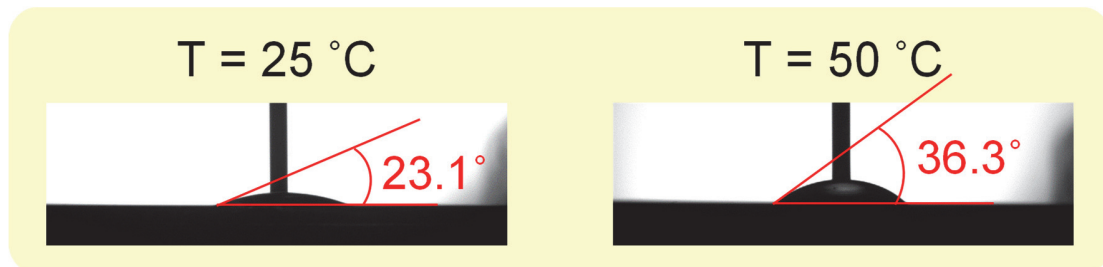

**Supplementary Figure 1. Water contact angle on IPN gel below and above its LCST.**  
The contact angles of water on the PNIPAAm/Alg IPN gel were measured at 25 °C (below LCST) and 50 °C (above LCST).
