# Supplementary material for: Thermo-responsive gels that absorb moisture and ooze water
Source: PubMed Central journal article supplement (PMC5998054; doi:10.1038/s41467-018-04810-8), 2018-06-13
Supplement: 41467_2018_4810_MOESM3_ESM.pdf [file 41467_2018_4810_MOESM3_ESM.pdf]

## **Description of Additional Supplementary Files**

**File Name: Supplementary Movie 1**

**Description:** Water oozing behaviour of the PNIPAAm/Alg IPN gel during heating at 50 °C after moisture absorption.
